# Supplementary material
Source: PubMed Central journal article supplement (PMC6053275)
Supplement: NIHMS975921-supplement-supplement_1.pdf [file NIHMS975921-supplement-supplement_1.pdf]

**Supplemental Table S1**

| Participant | HbA1c measures, total | Pre-Shared Medical Appointment |                |                |                  | Post-Shared Medical Appointments |                |                |                  |
|-------------|-----------------------|--------------------------------|----------------|----------------|------------------|----------------------------------|----------------|----------------|------------------|
|             |                       | Follow-up Time (days)          | HbA1c Measures | Mean HbA1c (%) | Median HbA1c (%) | Follow-up Time (days)            | HbA1c Measures | Mean HbA1c (%) | Median HbA1c (%) |
| PT_A        | 6                     | 308                            | 3              | 8.3            | 8.4              | 315                              | 3              | 7              | 7                |
| PT_B        | 7                     | 285                            | 3              | 11.3           | 11.2             | 294                              | 4              | 9.3            | 9.4              |
| PT_C        | 6                     | 84                             | 2              | 8              | 8                | 296                              | 4              | 10.9           | 11.1             |
| PT_D        | 9                     | 280                            | 5              | 10.5           | 10.4             | 357                              | 4              | 10             | 10.1             |
| PT_E        | 7                     | 355                            | 3              | 9.3            | 9.2              | 91                               | 4              | 8.1            | 7.8              |
| PT_F        | 8                     | 280                            | 5              | 7.8            | 7.4              | 266                              | 3              | 8              | 8.1              |
| PT_G        | 7                     | 285                            | 3              | 9.3            | 9.1              | 359                              | 4              | 8.4            | 8.5              |
| PT_H        | 6                     | 208                            | 3              | 12.9           | 12.7             | 301                              | 3              | 11.7           | 11               |

Abbreviations: SD = Standard Deviation; HbA1c = Hemoglobin A1c.
